# Supplementary material for: G9a Correlates with VLA-4 Integrin and Influences the Migration of Childhood Acute Lymphoblastic Leukemia Cells
Source: MDPI journal article supplement (doi:10.3390/cancers10090325), 2018-09-12
Supplement: s1 [file s1]

Supplementary Materials

# G9a correlates with VLA-4 integrin and influences the migration of childhood acute lymphoblastic leukemia cells.

Elena Madrazo, David Ruano, Lorea Abad, Estefanía Alonso-Gómez, Carmen Sánchez-Valdepeñas, África González-Murillo, Manuel Ramírez, and Javier Redondo Muñoz.

**Table S1.** Oligonucleotides for selected genes.

| Gene name | Sense   | Sequence              |
|-----------|---------|-----------------------|
| ITGA4     | Forward | GCGTGGTACAACCTTGACTGC |
|           | Reverse | TCCTCTTCCGCTCTGCTG    |
| G9A       | Forward | GGACACCCCTCGTAGTGAAG  |
|           | Reverse | GACAGAGGCTGGAGATGAGG  |
| SUV39H1   | Forward | GTCATGGAGTACGTGGGAGAG |
|           | Reverse | CCTGACGGTCGTAGATCTGG  |

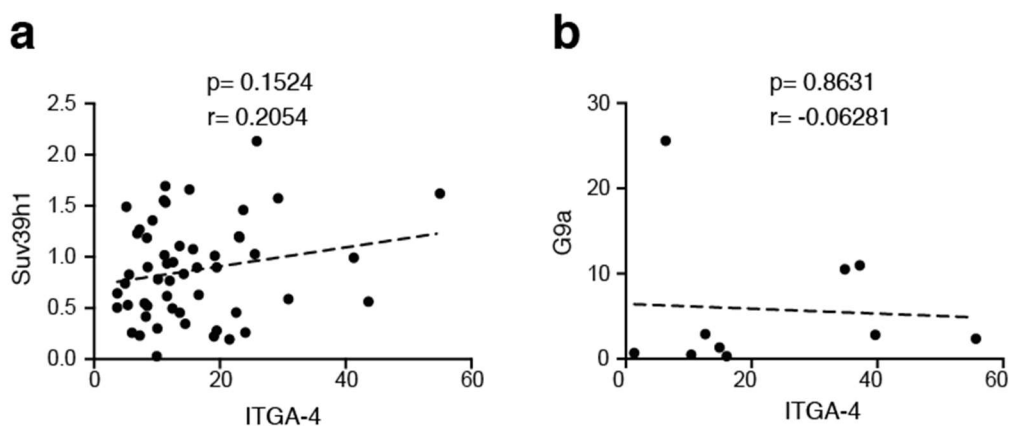

**Figure S1** (a) ITGA-4 and Suv39h1 expression analyzed by RT-qPCR. Expression levels were normalized by TBP and graph shows the mean of children ALL patients (n = 50). Pearson's correlation coefficient (r) and p-value are shown. (b) Samples from healthy donors (n = 10) were analyzed for the correlation between ITGA-4 and G9a. Pearson's correlation coefficient (r) and p-value are shown.

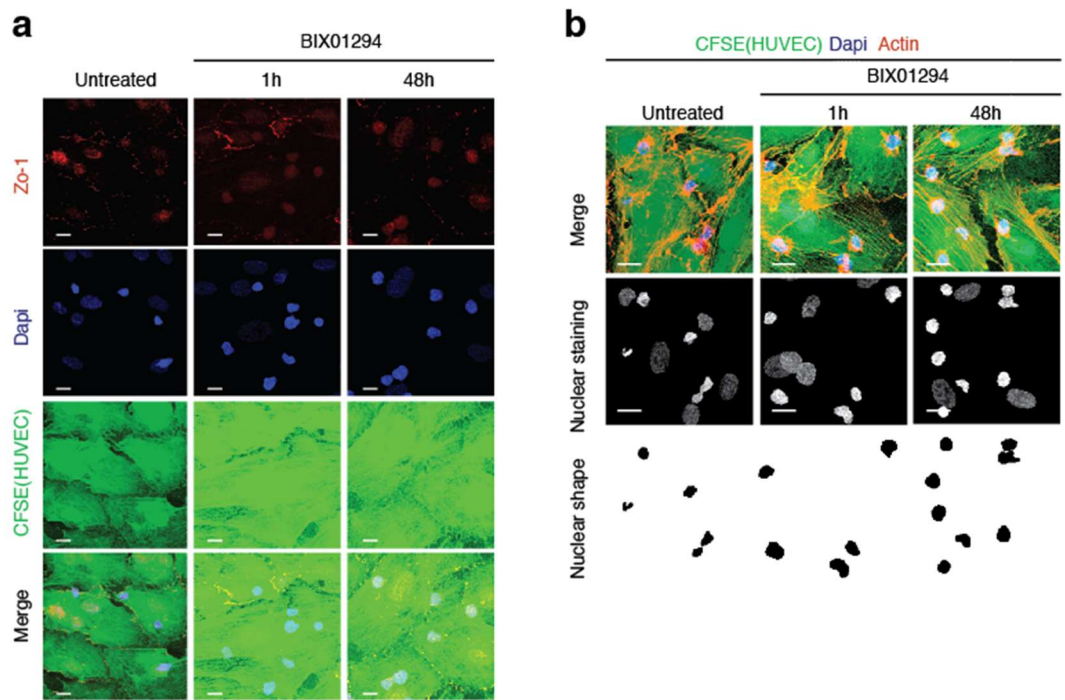

**Figure S2** (a) HUVEC cells were grown to confluency, labelled with CFSE and stimulated with TNFα for 16h. Control or BIX01294-treated Jurkat cells were plated on TNFα-activated HUVEC cells. Cells were fixed, permeabilized and analyzed to visualize their nuclei (DAPI, blue), F-actin (Phalloidin, cyan), and endothelial junctions (Zo-1, red). Bar= 10 μm. (b) Control and BIX01294-treated Jurkat cells were cultured on CFSE labelled HUVEC activated with TNFα, fixed and stained for DAPI (blue) and F-actin (red). Nuclear shapes were determined. Bar= 10 μm.

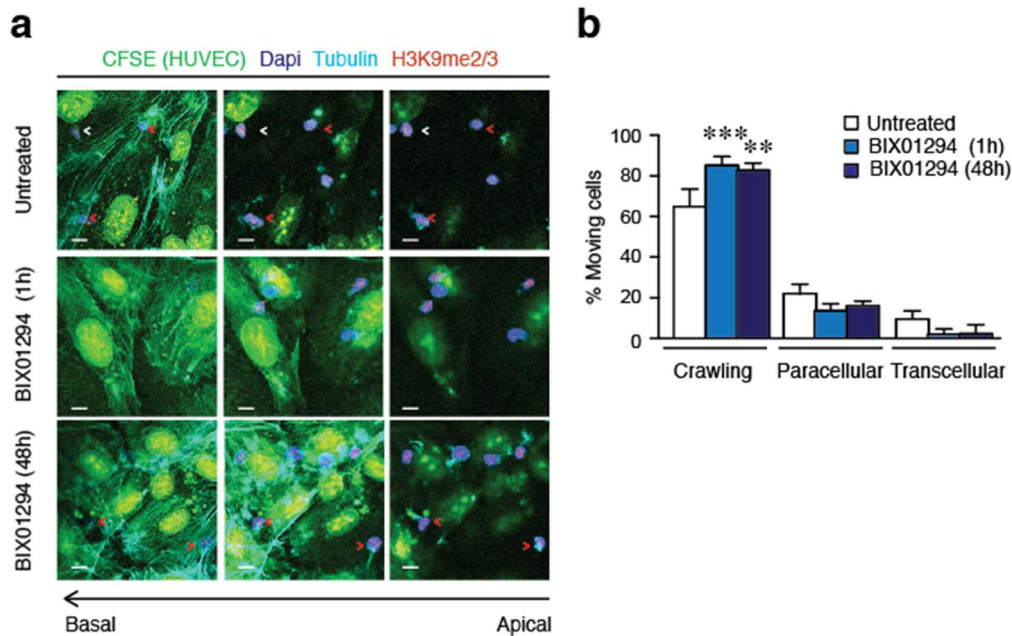

**Supplementary Figure S3.** (a) Control or BIX01294-treated Jurkat cells were plated on TNFα-activated HUVEC cells labelled with CFSE. After 30 min, cells were fixed, permeabilized and analyzed to visualize their nuclei (blue), F-actin (cyan), and H3K9me2/3 (red). White arrows indicate cells undergoing transcellular TEM. Red arrows indicate cells crossing through cell-cell junctions in paracellular TEM. (b) Graph shows the percentage of control or BIX01294-treated cells crawling or performing TEM. Mean n=3 ± SD. Bar= 10 μm. p<0.01 \*\*, p<0.001 \*\*\*.

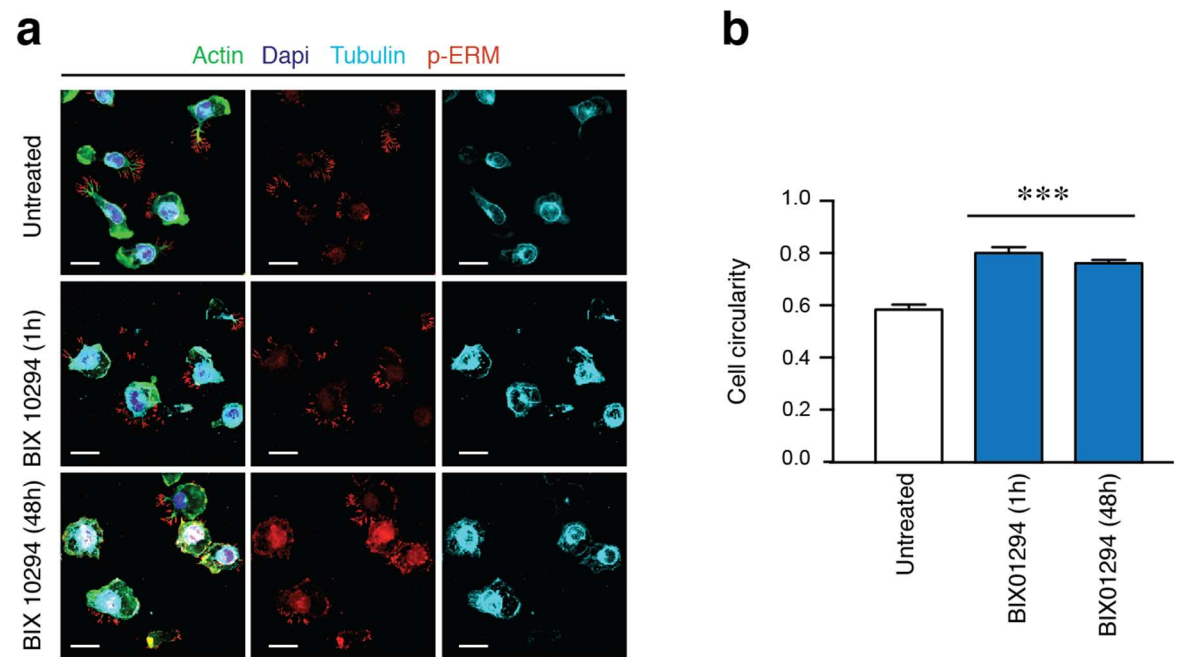

**Supplementary Figure S4.** (a) Control or BIX01294-treated Jurkat cells were cultured on VCAM1 (2 µg/ml) for 20 min. Cells were fixed and stained for tubulin (cyan) and trailing edge (phospho-ERM) marker. (b) Graph shows the rounded shape (circularity) of control or BIX01294-treated cells. Mean n=3 replicates ± SD. Bar= 10 µm. p<0.001 \*\*\*.
